# Supplementary material for: Investigations into the Performance of a Novel Pocket-Sized Near-Infrared Spectrometer for Cheese Analysis
Source: PubMed Central journal article supplement (PMC6385083; doi:10.3390/molecules24030428), 2019-01-24
Supplement: molecules-24-00428-s001.pdf [file molecules-24-00428-s001.pdf]

**Supplementary material 1.** SEPs and RPDs for all routes of analysis.

| Spectrometer  | Data analysis software   | Content  | State of cheese | SEP / %       | RPD    |       |
|---------------|--------------------------|----------|-----------------|---------------|--------|-------|
| NIRFlex N-500 | The Unscrambler X        | Fat      | Whole pieces    | 1.887         | 5.109  |       |
|               |                          |          | Grated cheese   | 0.679         | 14.022 |       |
|               |                          | Moisture | Whole pieces    | 1.108         | 5.597  |       |
|               |                          |          | Grated cheese   | 0.926         | 6.697  |       |
| SCiO          | The Unscrambler X        | Fat      | Whole pieces    | 1.159         | 7.754  |       |
|               |                          |          | Grated cheese   | 0.809         | 10.398 |       |
|               |                          | Moisture | Whole pieces    | 1.319         | 4.341  |       |
|               |                          |          | Grated cheese   | 1.729         | 3.208  |       |
|               | SCiO Lab web-application | Fat      | Whole pieces    | 0.785         | 11.448 |       |
|               |                          |          | Grated cheese   | 0.779         | 10.799 |       |
|               |                          | Moisture | Whole pieces    | 1.050         | 5.453  |       |
|               |                          |          | Grated cheese   | 1.102         | 5.034  |       |
|               |                          | SCiO App | Fat             | Whole pieces  | 1.064  | 7.832 |
|               |                          |          |                 | Grated cheese | 1.218  | 6.844 |
| Moisture      | Whole pieces             |          | 1.349           | 4.021         |        |       |
|               | Grated cheese            |          | 1.159           | 4.681         |        |       |

SEP – Standard Error of Prediction; RPD – Ratio of Performance to Deviation.
